# Supplementary material
Source: publisher figshare collection journal article supplement (https://karger.figshare.com/ndownloader/files/38287110)
Supplement: Supplementary file 1 [file 38287110]

Supplementary Table 1. Cytologic interpretations of SurePathTM and WellPrep®

|  | **SurePathTM** | **WellPrep®** |
| --- | --- | --- |
| NILM | 94 (45.9%) | 101 (49.3%) |
| ASC-US | 28 (13.7%) | 38 (18.5%) |
| LSIL | 48 (23.4%) | 32 (15.6%) |
| ASC-H | 10 (4.9%) | 11 (5.4%) |
| HSIL | 24 (11.7%) | 22 (10.7%) |
| SCC | 1 (0.5%) | 1 (0.5%) |
| Total | 205 (100%) | 205 (100%) |

Abbreviations: ASC-US, Atypical squamous cells of undetermined significance; ASC-H, Atypical squamous cells cannot exclude an HSIL; HSIL, High-grade squamous intraepithelial lesion; LSIL, Low-grade squamous intraepithelial lesion; NILM, Negative for intraepithelial lesion or malignancy; SCC, Squamous cell carcinoma.
